# Supplementary material for: Identification of a microRNA signature associated with risk of distant metastasis in nasopharyngeal carcinoma
Source: PubMed Central journal article supplement (PMC4414210; doi:10.18632/oncotarget.3005), 2015-01-23
Supplement: oncotarget-06-4537-s001.pdf [file oncotarget-06-4537-s001.pdf]

## SUPPLEMENTARY TABLES AND FIGURES

**Supplementary Table S1: MiRNAs with non-zero coefficients in the penalized regression model fitted to miRNA expression data from the training set**

| miRNA          | Penalized Coefficient |
|----------------|-----------------------|
| hsa-miR-140-5p | -0.65265805           |
| hsa-miR-154    | 0.416841936           |
| hsa-miR-34c-5p | -0.311288747          |
| hsa-miR-449b   | 0.27970981            |
| hsa-miR-136    | 0.278252522           |
| hsa-miR-1246   | 0.252954521           |
| hsa-miR-31     | 0.246736327           |
| hsa-miR-633    | -0.232982777          |
| hsa-miR-375    | 0.227348203           |
| hsa-miR-646    | -0.187297587          |
| hsa-miR-188-5p | -0.184079758          |
| hsa-miR-574-3p | 0.167259093           |
| hsa-miR-542-3p | -0.165407907          |
| hsa-miR-1      | 0.153553988           |
| hsa-miR-561    | -0.152880207          |
| hsa-miR-580    | -0.147656138          |
| hsa-miR-155    | -0.145379233          |
| hsa-miR-34c-3p | 0.114592858           |
| hsa-miR-196a   | -0.099335183          |
| hsa-miR-296-5p | 0.094110203           |
| hsa-miR-107    | 0.093446126           |
| hsa-miR-663b   | 0.074681673           |
| hsa-miR-600    | 0.063613683           |
| hsa-miR-142-5p | -0.060944673          |
| hsa-miR-132    | -0.056635448          |
| ebv-miR-BART14 | 0.048490936           |
| hsa-miR-362-5p | 0.043422478           |
| hsa-miR-377    | 0.04287268            |
| hsa-miR-934    | -0.036495034          |
| hsa-miR-144    | 0.034527264           |
| hsa-miR-188-3p | -0.033462301          |
| hsa-miR-93     | 0.007480249           |
| hsa-miR-579    | -0.003676771          |

**A.**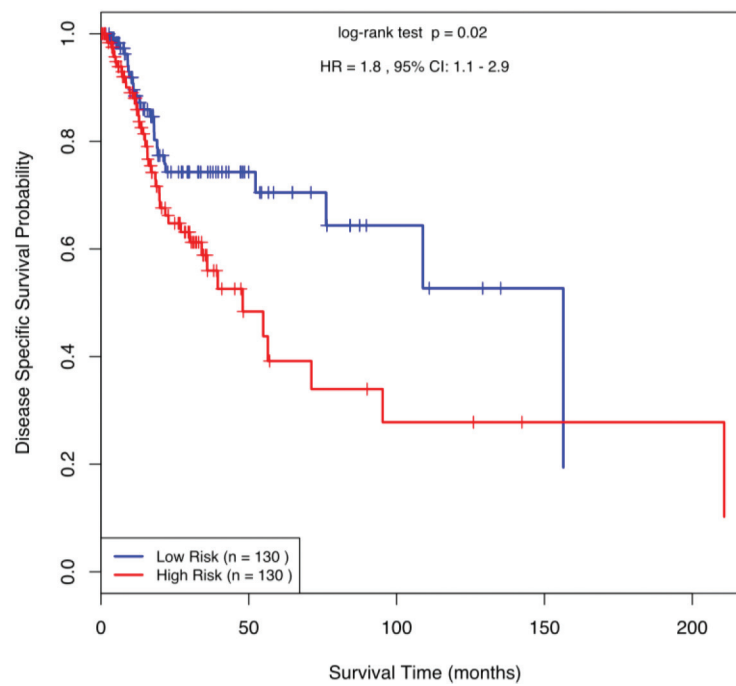**B.**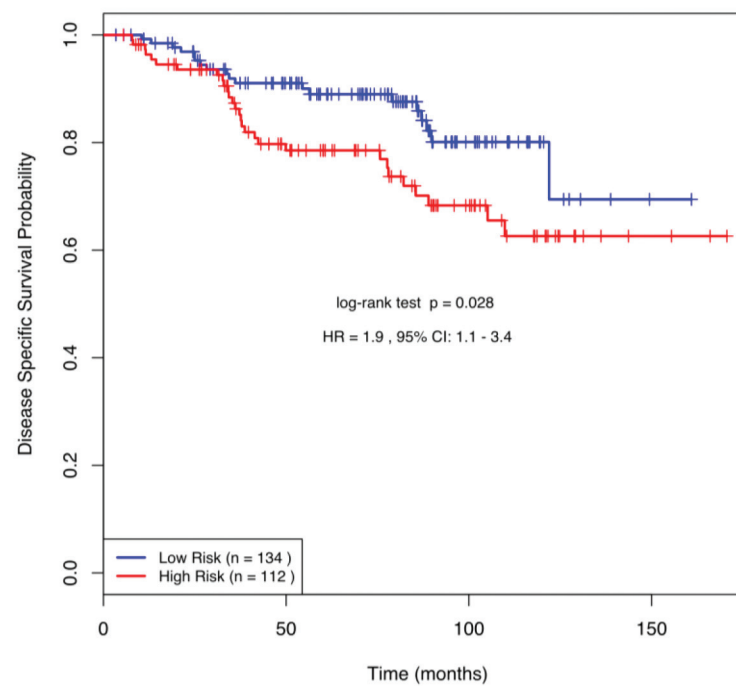

**Figure S1:** Kaplan-Meier curves demonstrating the association between Disease Specific Survival the 4-miRNA signature applied to **A)** HNSCC miRNA-Seq Data generated by TCGA (n=260) and **B)** the combined training and validation sets of NPC patients (n=246). “High Risk” is defined as a  $RS \geq$  the median, and “Low Risk” is defined as a  $RS <$  the median. RS; Risk Score, HR; Hazard Ratio, CI; Confidence Interval.

**Supplementary Table S2: C-statistics for comparison of various CoxPH models' ability to predict DM**

| Covariates included in the model (levels for each variable)            | C-Statistic ± SE |              |                |
|------------------------------------------------------------------------|------------------|--------------|----------------|
|                                                                        | Combined Data    | Training Set | Validation Set |
| 4-miRNA Signature (High Risk/Low Risk), N-stage (N0&1/N2&3)            | 0.78 ± 0.048     | 0.83 ± 0.069 | 0.74 ± 0.065   |
| 5-miRNA Liu et al. Signature (High Risk/Low Risk), N-stage (N0&1/N2&3) | 0.74 ± 0.048     | 0.79 ± 0.069 | 0.69 ± 0.066   |
| 4-miRNA Signature (High Risk/Low Risk)                                 | 0.71 ± 0.050     | 0.77 ± 0.073 | 0.66 ± 0.070   |
| TNM-stage (I/II/III/IV)                                                | 0.67 ± 0.049     | 0.80 ± 0.070 | 0.48 ± 0.067   |
| N-stage (N0&1/N2&3)                                                    | 0.62 ± 0.043     | 0.66 ± 0.063 | 0.59 ± 0.058   |
| 5-miRNA Liu et al. Signature (High Risk/Low Risk)                      | 0.60 ± 0.044     | 0.59 ± 0.063 | 0.60 ± 0.061   |
| T-Stage (T1&2/T3&4)                                                    | 0.55 ± 0.043     | 0.55 ± 0.063 | 0.55 ± 0.059   |

**Supplementary Table S3: All miRNA-Target entries from miRTarBase for miRNAs from our 4-miRNA signature, Liu et al.'s 5-miRNA signature and the 5% most frequently occurring miRNAs in random signatures significantly associated with distant metastasis**

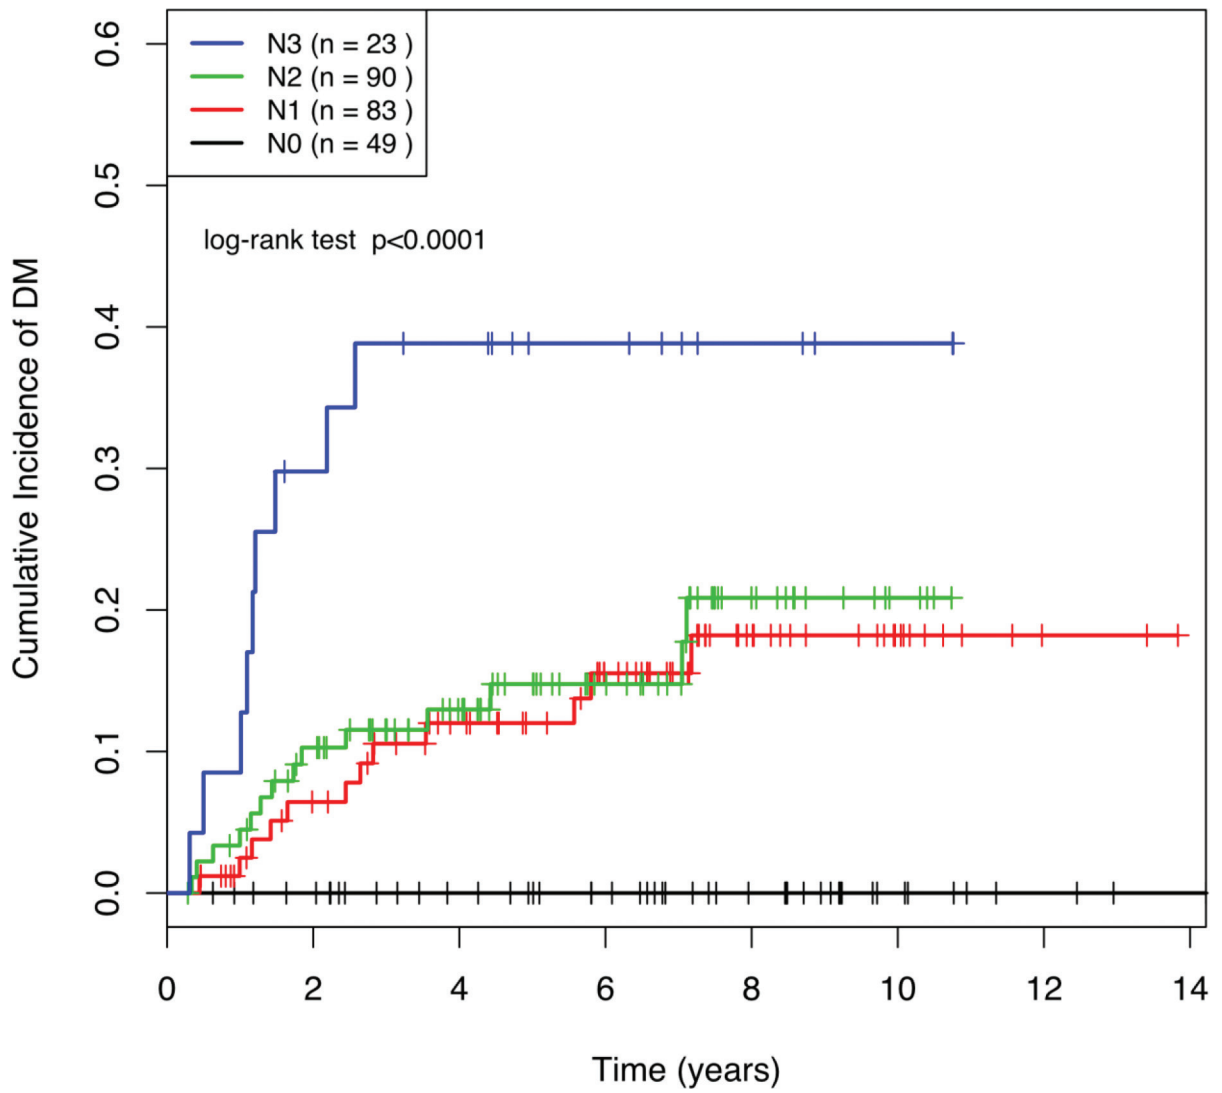

**Figure S2:** Kaplan-Meier curves demonstrating distant metastasis free survival (DMFS) based on clinical Nodal-stage in the combined dataset (n=245).

**A.**

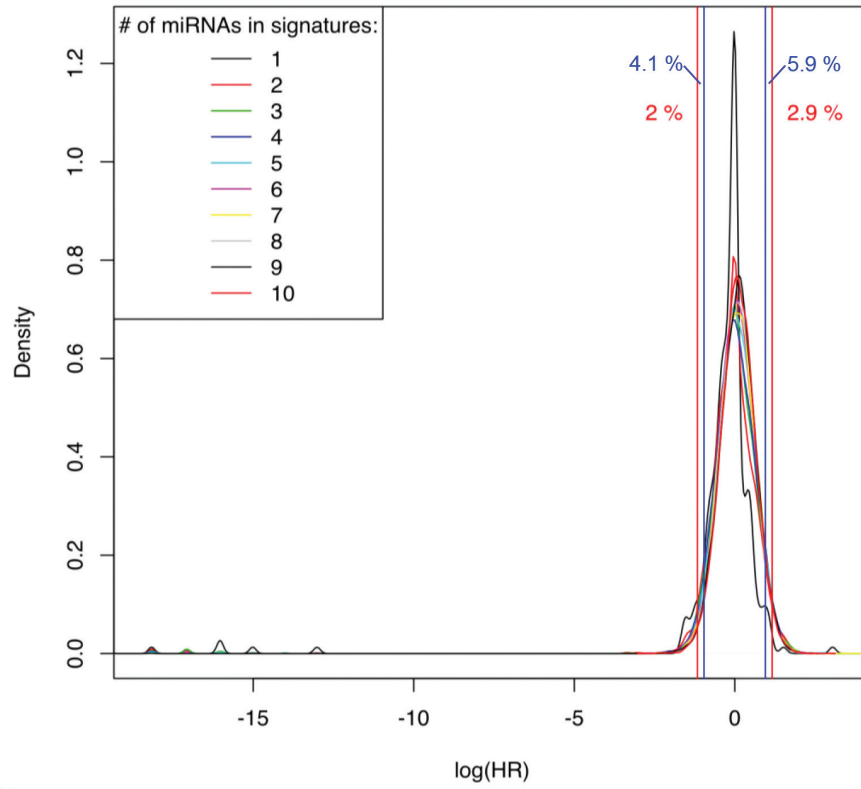

**B.**

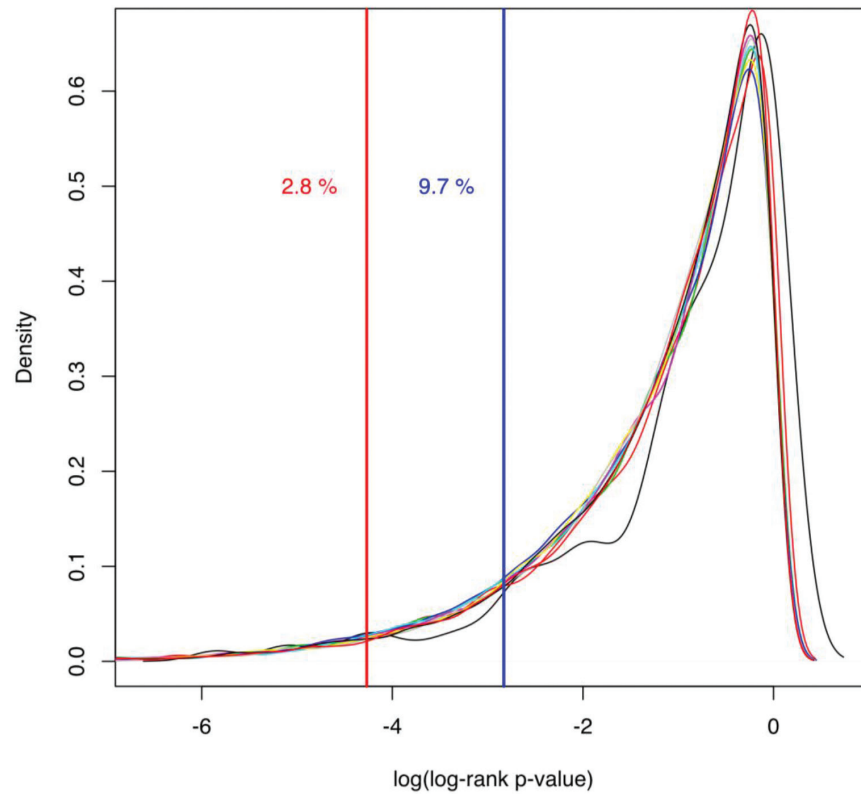

**Figure S3:** Distribution of **A)** hazard ratios and **B)** p-values for random miRNAs signatures. Red lines and percentages show the position of the 4-miRNA signature described herein and blue lines and percentages show the position of the 5-miRNA signature described by Liu *et al.*

**Supplementary Table S4: Pathway enrichment results from DAVID for targets of the three sets of miRNAs analyzed**

| 4-miRNA Signature |                                   |       |                 |             |          |                                                                                   |
|-------------------|-----------------------------------|-------|-----------------|-------------|----------|-----------------------------------------------------------------------------------|
| Category          | Term                              | Count | Fold Enrichment | P-Value     | FDR      | Genes (Entrez IDs)                                                                |
| KEGG_PATHWAY      | hsa05200:Pathways in cancer       | 14    | 5.934944238     | 5.56E-08    | 5.51E-07 | 596, 5156, 2033, 2254, 1019, 1871, 1021, 9134, 7422, 2247, 3065, 7046, 4233, 4609 |
| KEGG_PATHWAY      | hsa05218:Melanoma                 | 7     | 14.00438596     | 5.49E-06    | 5.44E-05 | 1021, 5156, 2247, 2254, 1019, 4233, 1871                                          |
| KEGG_PATHWAY      | hsa04110:Cell cycle               | 8     | 8.526034713     | 1.99E-05    | 1.97E-04 | 1021, 9134, 993, 2033, 3065, 1019, 1871, 4609                                     |
| KEGG_PATHWAY      | hsa05220:Chronic myeloid leukemia | 6     | 9.636820926     | 2.60E-04    | 2.58E-03 | 1021, 3065, 1019, 7046, 1871, 4609                                                |
| KEGG_PATHWAY      | hsa05222:Small cell lung cancer   | 6     | 9.636820926     | 2.60E-04    | 2.58E-03 | 1021, 9134, 596, 1019, 1871, 4609                                                 |
| PANTHER_PATHWAY   | P00059:p53 pathway                | 6     | 6.371312898     | 0.001374557 | 1.08E-02 | 9134, 993, 2033, 3065, 1871, 23411                                                |
| KEGG_PATHWAY      | hsa05212:Pancreatic cancer        | 5     | 8.771978022     | 0.001931006 | 1.90E-02 | 1021, 7422, 1019, 7046, 1871                                                      |
| KEGG_PATHWAY      | hsa04330:Notch signaling pathway  | 4     | 13.03265306     | 0.00294798  | 2.88E-02 | 4855, 2033, 4851, 3065                                                            |
| KEGG_PATHWAY      | hsa05210:Colorectal cancer        | 5     | 7.602380952     | 0.003271684 | 3.20E-02 | 596, 5156, 7046, 4233, 4609                                                       |
| KEGG_PATHWAY      | hsa05219:Bladder cancer           | 4     | 11.6959707      | 0.00402467  | 3.92E-02 | 7422, 1019, 1871, 4609                                                            |
| KEGG_PATHWAY      | hsa05215:Prostate cancer          | 5     | 7.127232143     | 0.004135801 | 4.02E-02 | 9134, 596, 5156, 2033, 1871                                                       |

**5-miRNA Signature (Liu et al.)**

| Category     | Term                            | Count | Fold Enrichment | P-Value  | FDR         | Genes (Entrez IDs)                                                                                                                                                                                                                            |
|--------------|---------------------------------|-------|-----------------|----------|-------------|-----------------------------------------------------------------------------------------------------------------------------------------------------------------------------------------------------------------------------------------------|
| KEGG_PATHWAY | hsa05222:Small cell lung cancer | 18    | 2.95435386      | 6.30E-05 | 0.000751692 | 595, 5728, 1869, 596, 1282, 1284, 4843, 5970, 5925, 6502, 3685, 1021, 9134, 10000, 3915, 898, 5296, 4609                                                                                                                                      |
| KEGG_PATHWAY | hsa05200:Pathways in cancer     | 40    | 1.732830434     | 4.87E-04 | 0.005798685 | 3725, 1869, 6774, 5970, 2932, 332, 1026, 7422, 3320, 2956, 7048, 7046, 595, 5601, 1487, 5728, 1857, 596, 1282, 1284, 4843, 5925, 2737, 6502, 3685, 1021, 9134, 10000, 2885, 3915, 54361, 4089, 1613, 112399, 898, 5879, 3569, 998, 5296, 4609 |

(Continued)

|                  |                                          |    |             |             |             |                                                                                                                                                                                                                                         |
|------------------|------------------------------------------|----|-------------|-------------|-------------|-----------------------------------------------------------------------------------------------------------------------------------------------------------------------------------------------------------------------------------------|
| KEGG_PATHWAY     | hsa04110:Cell cycle                      | 21 | 2.287093253 | 5.52E-04    | 0.00656649  | 595, 10971, 8881, 1869, 4174, 8697, 2932, 5925, 1026, 6502, 9232, 1021, 9134, 990, 894, 51433, 4089, 7531, 898, 4085, 4609                                                                                                              |
| KEGG_PATHWAY     | hsa05212:Pancreatic cancer               | 15 | 2.68921954  | 8.97E-04    | 0.01065014  | 595, 5601, 1869, 6774, 5970, 5925, 1021, 10000, 7422, 4089, 7048, 7046, 5879, 5296, 998                                                                                                                                                 |
| KEGG_PATHWAY     | hsa05210:Colorectal cancer               | 16 | 2.486034063 | 0.001334521 | 0.015802398 | 3725, 595, 5601, 1857, 596, 2932, 332, 10000, 2885, 2956, 4089, 7048, 7046, 5879, 5296, 4609                                                                                                                                            |
| REACTOME_PATHWAY | REACT_152:Cell Cycle, Mitotic            | 39 | 1.608088235 | 0.001937666 | 0.019112212 | 5717, 5718, 8881, 1869, 8697, 332, 6241, 5710, 1026, 5684, 5683, 81565, 3320, 6118, 57551, 595, 5116, 4174, 3619, 7283, 5426, 5983, 5693, 5925, 57122, 6502, 6233, 9232, 5687, 1021, 9134, 1639, 990, 5501, 894, 51433, 7531, 898, 4085 |
| KEGG_PATHWAY     | hsa05220:Chronic myeloid leukemia        | 15 | 2.46196155  | 0.002214934 | 0.026101979 | 595, 1487, 1869, 5970, 5925, 1026, 1021, 10000, 2885, 25759, 4089, 7048, 7046, 5296, 4609                                                                                                                                               |
| BIOCARTA         | h_g1Pathway:Cell Cycle: G1/S Check Point | 9  | 3.459272727 | 0.002399096 | 0.029798975 | 595, 1021, 1869, 2932, 4089, 5925, 1026, 6502, 898                                                                                                                                                                                      |
| KEGG_PATHWAY     | hsa04510:Focal adhesion                  | 25 | 1.879562044 | 0.002594272 | 0.030509182 | 3725, 2932, 7422, 3696, 81, 595, 5601, 1281, 5728, 1282, 596, 1284, 858, 3685, 10000, 25759, 2885, 5501, 3915, 1277, 894, 1278, 5879, 5296, 998                                                                                         |
| REACTOME_PATHWAY | REACT_1538:Cell Cycle Checkpoints        | 19 | 2.057486631 | 0.003414782 | 0.033460376 | 5717, 8881, 5718, 4174, 8697, 5710, 5983, 5693, 1026, 6233, 5684, 5683, 5687, 9134, 990, 51433, 6118, 898, 4085                                                                                                                         |

(Continued)

|                 |                           |    |             |            |             |                                                                                                 |
|-----------------|---------------------------|----|-------------|------------|-------------|-------------------------------------------------------------------------------------------------|
| PANTHER_PATHWAY | P00048:PI3 kinase pathway | 16 | 2.185714286 | 0.00437582 | 0.046489727 | 595, 10971, 5728, 22887, 2309, 4843, 2932, 2776, 2771, 3481, 10000, 3484, 2885, 894, 7531, 5296 |
|-----------------|---------------------------|----|-------------|------------|-------------|-------------------------------------------------------------------------------------------------|

**5% most frequently occurring miRNAs in random signatures significantly associated with distant metastasis**

| Category     | Term                                     | Count | Fold Enrichment | P-Value  | FDR         | Genes (Entrez IDs)                                                                                                                                                                                                                                                                                            |
|--------------|------------------------------------------|-------|-----------------|----------|-------------|---------------------------------------------------------------------------------------------------------------------------------------------------------------------------------------------------------------------------------------------------------------------------------------------------------------|
| KEGG_PATHWAY | hsa05210:Colorectal cancer               | 23    | 2.846472868     | 6.05E-06 | 7.29577E-05 | 3725, 595, 7855, 596, 83439, 5604, 91, 581, 4436, 332, 7157, 54205, 7040, 8322, 8323, 8312, 4089, 2353, 7046, 5879, 4609, 5296, 4087                                                                                                                                                                          |
| BIOCARTA     | h_g1Pathway:Cell Cycle: G1/S Check Point | 14    | 3.6995          | 1.29E-05 | 0.00016645  | 595, 1869, 1029, 1019, 1027, 25, 7157, 983, 7040, 1719, 1021, 472, 3065, 4089                                                                                                                                                                                                                                 |
| KEGG_PATHWAY | hsa05200:Pathways in cancer              | 52    | 1.794285467     | 1.83E-05 | 0.000220756 | 3725, 1869, 332, 2335, 331, 3728, 8322, 8323, 387, 5743, 5604, 581, 2322, 25, 8453, 8312, 2113, 4089, 4792, 5879, 4609, 4087, 8030, 2033, 5970, 8031, 1029, 1027, 7040, 7422, 3320, 7046, 595, 7855, 596, 83439, 5898, 91, 4436, 7428, 1019, 1871, 7157, 1870, 1021, 9134, 54205, 3065, 2353, 3569, 5296, 999 |
| KEGG_PATHWAY | hsa05212:Pancreatic cancer               | 20    | 2.855992844     | 2.80E-05 | 0.000337833 | 595, 1869, 5898, 9459, 91, 5970, 5604, 1029, 1019, 1871, 7157, 1870, 1021, 7040, 7422, 4089, 7046, 5879, 5296, 4087                                                                                                                                                                                           |
| KEGG_PATHWAY | hsa05220:Chronic myeloid leukemia        | 21    | 2.745373403     | 3.14E-05 | 0.000378112 | 595, 1869, 6464, 91, 5970, 5604, 1029, 1019, 25, 1027, 1871, 7157, 1870, 1021, 7040, 3065, 4089, 7046, 4792, 5296, 4609                                                                                                                                                                                       |
| KEGG_PATHWAY | hsa04115:p53 signaling pathway           | 19    | 2.89110751      | 3.97E-05 | 0.000478735 | 595, 8493, 581, 1111, 1029, 27244, 6241, 1019, 7157, 5054, 983, 1021, 64326, 54205, 9134, 472, 894, 891, 900                                                                                                                                                                                                  |

(Continued)



|                 |                                                                           |    |             |             |             |                                                                                                                                                          |
|-----------------|---------------------------------------------------------------------------|----|-------------|-------------|-------------|----------------------------------------------------------------------------------------------------------------------------------------------------------|
| KEGG_PATHWAY    | hsa04110:Cell cycle                                                       | 26 | 2.255433601 | 1.05E-04    | 0.00126249  | 1869, 2033, 8317, 1029, 1027, 983, 7040, 5111, 595, 4173, 890, 1111, 1019, 25, 1871, 7157, 1870, 9134, 1021, 472, 3065, 4089, 894, 891, 4609, 4087       |
| KEGG_PATHWAY    | hsa05222:Small cell lung cancer                                           | 18 | 2.353177203 | 0.001008706 | 0.012099305 | 595, 1869, 596, 5743, 5970, 2335, 1019, 331, 1027, 1871, 7157, 1870, 1021, 9134, 54205, 4792, 5296, 4609                                                 |
| KEGG_PATHWAY    | hsa04310:Wnt signaling pathway                                            | 25 | 1.966520497 | 0.00127272  | 0.01524388  | 3725, 23236, 2033, 1454, 5534, 81839, 8322, 8323, 387, 85407, 595, 7855, 83439, 79718, 5566, 7157, 57680, 5529, 8312, 10725, 4089, 894, 5879, 4609, 4087 |
| KEGG_PATHWAY    | hsa05215:Prostate cancer                                                  | 19 | 2.204469477 | 0.001565338 | 0.018718412 | 595, 1869, 596, 83439, 2033, 5604, 5970, 5170, 1385, 1027, 1871, 7157, 1870, 3481, 9134, 3320, 468, 4792, 5296                                           |
| KEGG_PATHWAY    | hsa05219:Bladder cancer                                                   | 12 | 2.855992844 | 0.001953074 | 0.023305052 | 595, 1869, 7422, 9252, 5604, 1029, 1019, 1871, 7157, 4609, 1870, 999                                                                                     |
| PANTHER_PATHWAY | P04398:p53 pathway feedback loops 2                                       | 14 | 2.428571429 | 0.003000301 | 0.033324017 | 8493, 890, 1432, 1029, 8626, 5170, 7157, 1871, 983, 9134, 472, 900, 5296, 4609                                                                           |
| BIOCARTA        | h_ctcfPathway:CTCF: First Multivalent Nuclear Factor                      | 8  | 3.523333333 | 0.003408536 | 0.043224237 | 7040, 10664, 1029, 7049, 4089, 1027, 4086, 7157                                                                                                          |
| KEGG_PATHWAY    | hsa05014:Amyotrophic lateral sclerosis (ALS)                              | 11 | 2.836159561 | 0.003522393 | 0.041668875 | 54205, 6647, 596, 1432, 581, 7124, 5868, 847, 5879, 7157, 5534                                                                                           |
| BIOCARTA        | h_RacCycDPathway: Influence of Ras and Rho proteins on G1 to S Transition | 10 | 2.872282609 | 0.003882954 | 0.049101815 | 595, 1021, 1869, 387, 5970, 1019, 5058, 1027, 4792, 5879                                                                                                 |

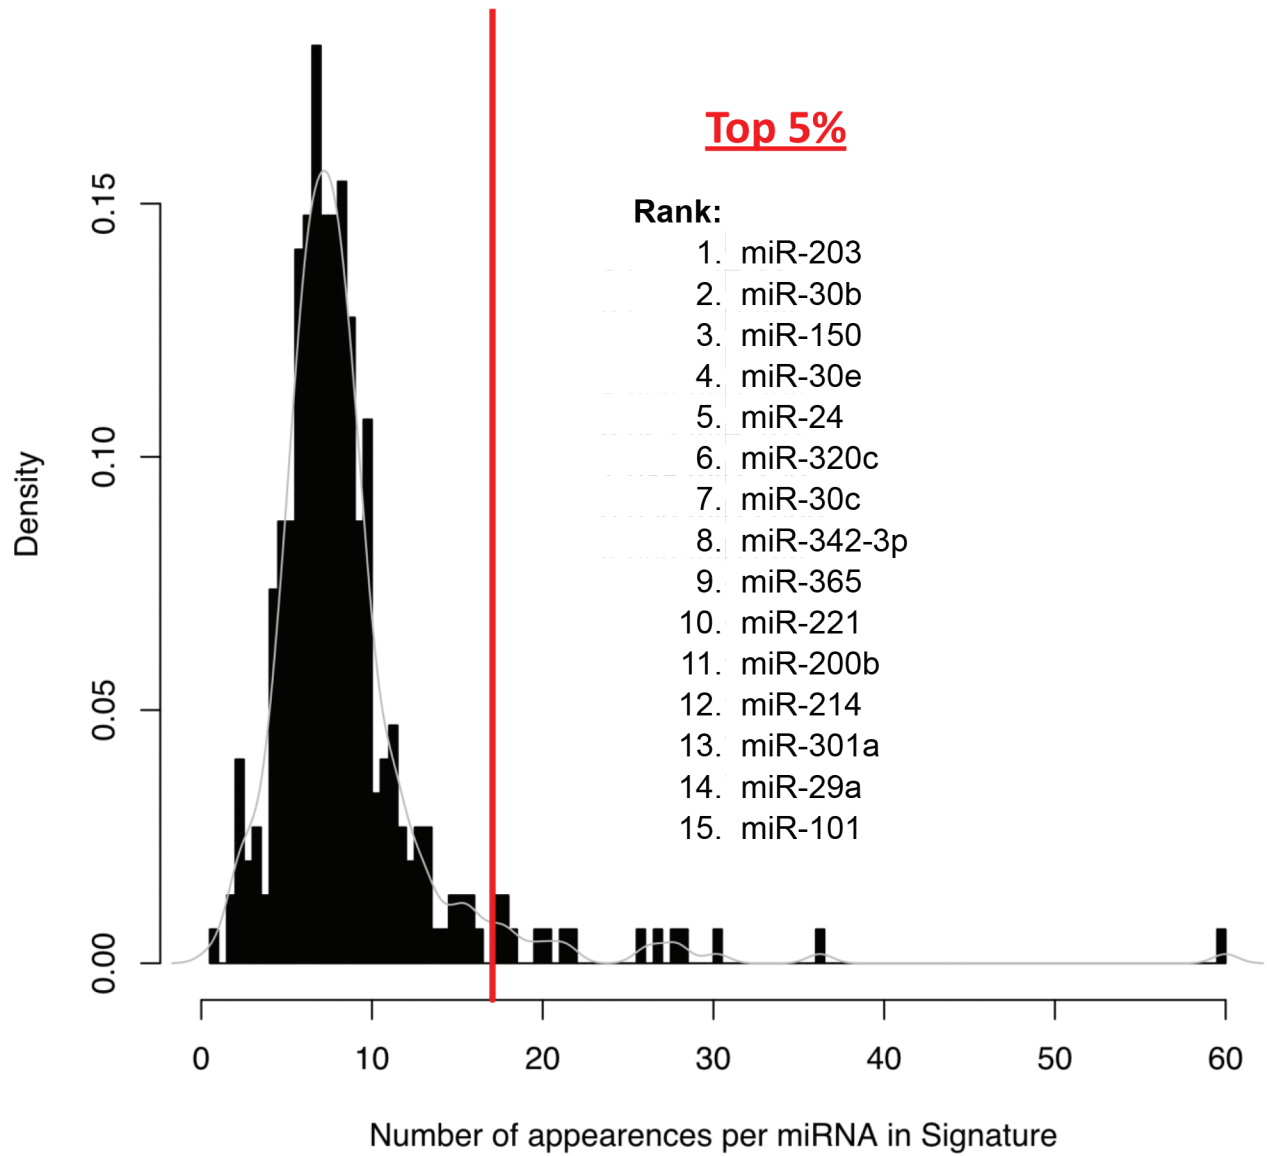

**Figure S4:** Distribution of the number of times each miRNA appears in a random miRNA signature with a p-value  $\leq 0.014$ ; that of the 4-miRNA signature identified herein. The 5% most frequently occurring miRNAs are listed to the right of the red line, ranked in order from most to least frequently occurring.

**Supplementary Table S5: Univariate and multivariate CoxPH analysis of clinical factors and miRNA-signature Risk-Score in the Validation cohorts only ( $n = 121$ )**

|                                          | Univariate    |                 | Multivariate  |                 |
|------------------------------------------|---------------|-----------------|---------------|-----------------|
|                                          | HR (95% CI)   | <i>p</i> -value | HR (95% CI)   | <i>p</i> -value |
| <b>MiRNA RS (High Risk vs. Low Risk)</b> | 3.2 (1.2–8.5) | 0.01            | 3.4 (1.3–9.1) | 0.02            |
| <b>T stage (T1&amp;2 vs. T3&amp;4)</b>   | 1.6 (0.6–4.0) | 0.34            | 1.6 (0.6–4.2) | 0.39            |
| <b>N stage (N0&amp;1 vs. N2&amp;3)</b>   | 1.8 (0.7–4.6) | 0.2             | 1.9 (0.7–4.9) | 0.19            |
| <b>Age</b>                               | 1.0 (0.9–1.0) | 0.62            | 1.0 (1.0–1.0) | 0.56            |
| <b>Gender (Female vs. Male)</b>          | 1.2 (0.4–3.8) | 0.7             | 1.3 (0.4–4.1) | 0.62            |
| <b>Chemotherapy (- vs. +)</b>            | 1.0 (0.4–2.8) | 0.99            | 0.6 (0.2–1.9) | 0.43            |

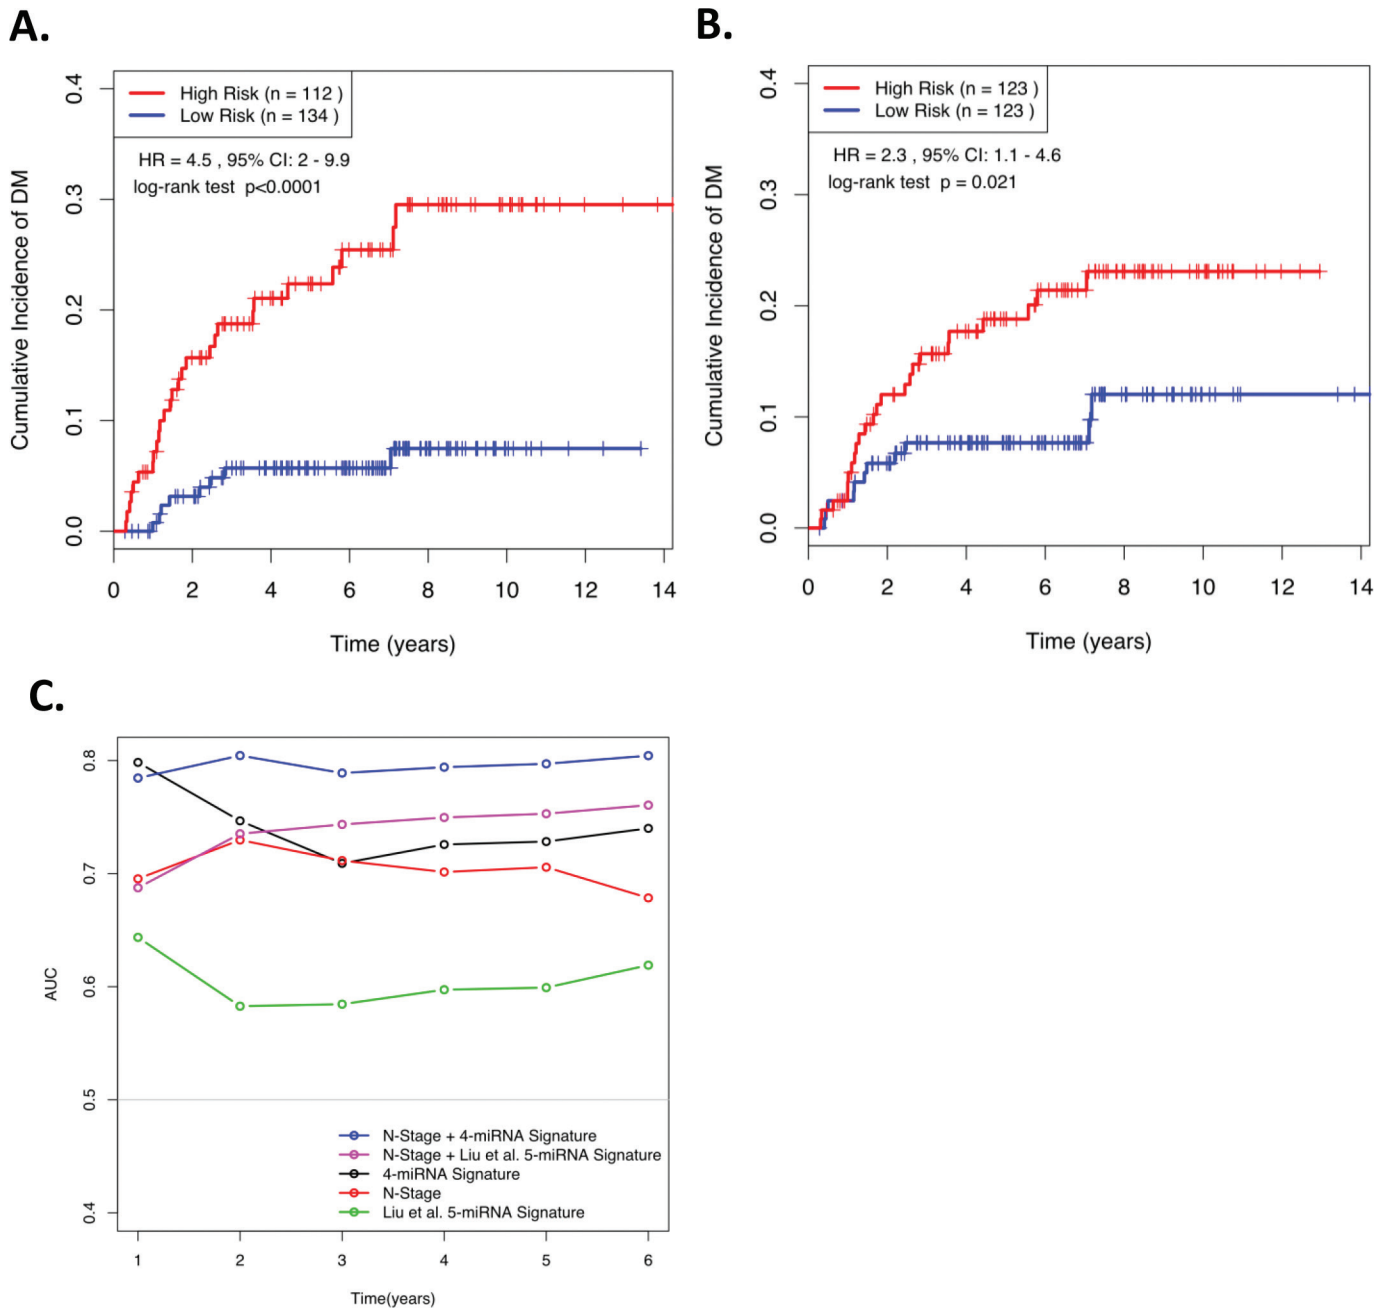

**Figure S5:** (A&B) Kaplan-Meier curves showing distant relapse in the combined data set including both the training and validation cohorts (n=246). Patients were dichotomized by A) the 4-miRNA signature described in the current study or B) the 5-miRNA signature described by Liu et al.<sup>34</sup>. “High Risk” is defined as a RS  $\geq$  the median in the training set, and “Low Risk” is defined as a RS < the median in the training set. C) ROC AUCs across multiple time points showing the ability of the 4-miRNA signature described herein, the 5-miRNA signature reported by Liu et al.<sup>31</sup> and N-stage alone or combined with either signature to predict DM in NPC patients. These data demonstrate that the model including N-stage and the 4-miRNA signature is the most robust prognostic signature. HR; Hazard Ratio, CI; Confidence Interval, N; Nodal, ROC; receiver operating characteristic. AUC; Area under the curve, RS; Risk Score.

FFPE samples Training Set (n=125)

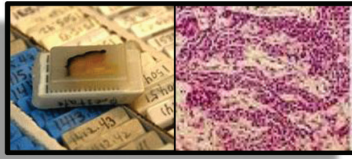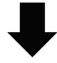

RNA Extraction & Nanostring nCounter Assay

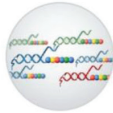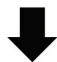

Prognostic Model Training

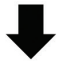

Prognostic miRNA expression signature

FFPE samples Validation Set (n=121)

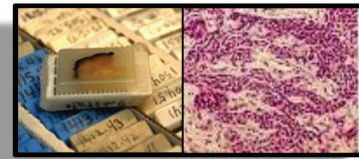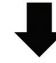

RNA Extraction & Nanostring nCounter Assay

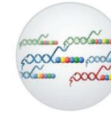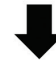

Independent Validation of miRNA Signature

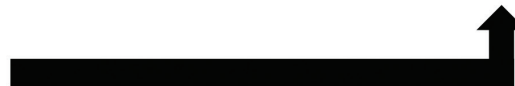

Figure S6: Schematic diagram showing miRNA signature generation and validation workflow used in the current study.
